# Supplementary material for: Preparation of different shaped α-Fe2O3 nanoparticles with large particles of iron oxide red
Source: Royal Society of Chemistry journal article supplement (doi:10.1039/c8ce01920g), 2018-12-21
Supplement: c8ce01920g1.pdf [file c8ce01920g1.pdf]

## Electronic Supporting Information (ESI)

### Preparation of different shaped $\alpha$ -Fe<sub>2</sub>O<sub>3</sub> nanoparticles with large particle of iron oxide red

Jianxing Liu <sup>a</sup>, He Yang <sup>a,b</sup> and Xiangxin Xue <sup>\*a,b</sup>

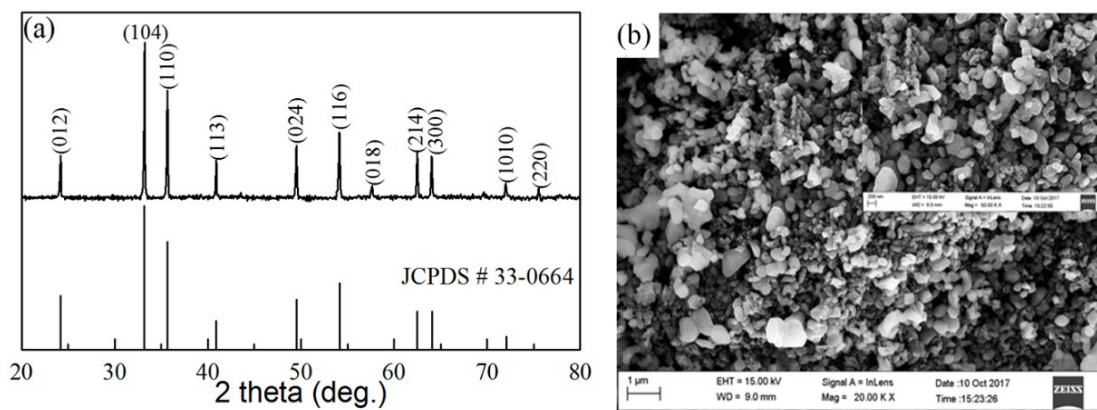

Figure S1 (a) XRD pattern and (b) SEM image of iron oxide red.

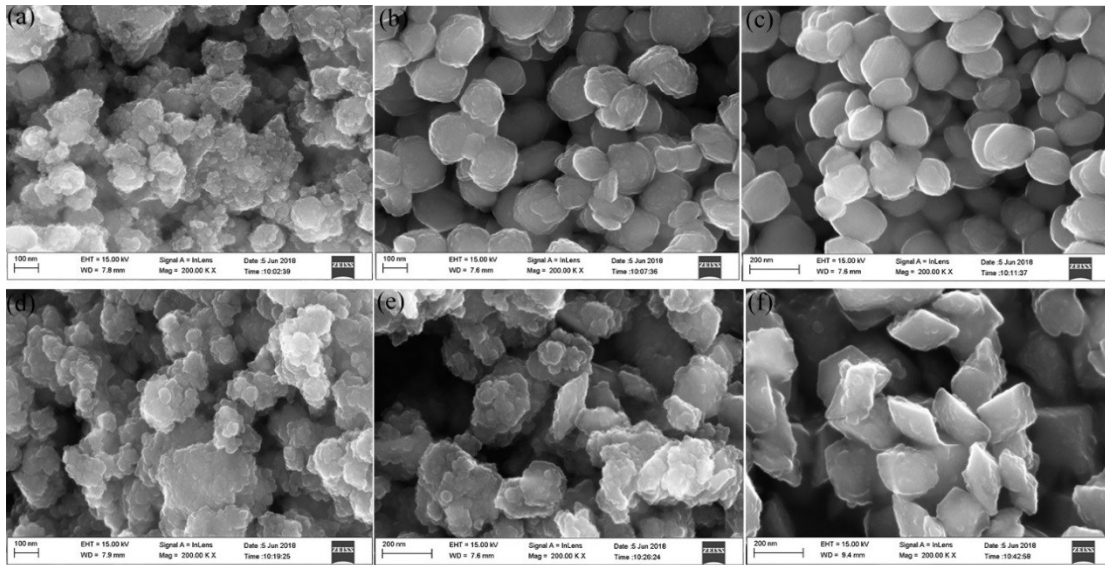

Figure S2. SEM images of the samples prepared at 180 °C for different times (a) CH<sub>3</sub>COOH 1h, (b) CH<sub>3</sub>COOH 2h, (c) CH<sub>3</sub>COOH 4h, (d) HCl 1h, (e) HCl 2h, (f) HCl 4h.

Table S1 The chemical composition of oxidized scale (mass/%)

| Chemical composition | Fe <sub>2</sub> O <sub>3</sub> | CaO  | SiO <sub>2</sub> | Al <sub>2</sub> O <sub>3</sub> | MnO  |
|----------------------|--------------------------------|------|------------------|--------------------------------|------|
| Mass/%               | 99.18                          | 0.05 | 0.05             | 0.15                           | 0.37 |

Table S2 The crystal structure parameters, FTIR positions ( $\nu_1$ ,  $\nu_2$ ), band gap energies ( $E_g$ ) and magnetic properties ( $M_r$ ,  $H_c$ ) of prepared  $\alpha$ -Fe<sub>2</sub>O<sub>3</sub>

| Sample                         | $A$ (Å) | $c$ (Å) | $\nu_1$ (cm <sup>-1</sup> ) | $\nu_2$ (cm <sup>-1</sup> ) | $E_g$ (eV) | $M_r$ (emu/g) | $H_c$ (Oe) |
|--------------------------------|---------|---------|-----------------------------|-----------------------------|------------|---------------|------------|
| None                           | 5.0180  | 13.7422 | 565                         | 477                         | 1.94       | 0.082         | 2441       |
| HCl                            | 5.0014  | 13.6827 | 546                         | 475                         | 2.04       | 0.139         | 1695       |
| H <sub>2</sub> SO <sub>4</sub> | 5.0170  | 13.7338 | 570                         | 477                         | 2.02       | 0.128         | 909        |
| HNO <sub>3</sub>               | 5.0089  | 13.7086 | 540                         | 471                         | 2.06       | 0.152         | 1045       |
| CH <sub>3</sub> COOH           | 5.0065  | 13.6932 | 562                         | 481                         | 1.98       | 0.141         | 480        |
